# Supplementary material
Source: PubMed Central journal article supplement (PMC4224641)
Supplement: NIHMS580435-supplement-Supp_FigureS1.pdf [file NIHMS580435-supplement-Supp_FigureS1.pdf]

Supplemental Figure 1 ACTH and Cortisol Cross-Reactivities

ACTH

| Compound            | pg/mL Added | Percent Cross-Reactivity |
|---------------------|-------------|--------------------------|
| <b>ACTH (1-18)</b>  |             |                          |
|                     | 500         | Not detectable (ND)      |
|                     | 5,000       | ND                       |
|                     | 50,000      | ND                       |
|                     | 500,000     | ND                       |
| <b>ACTH (1-24)</b>  |             |                          |
|                     | 500         | 1%                       |
|                     | 5,000       | 0.5%                     |
|                     | 50,000      | 0.2%                     |
|                     | 500,000     | ND                       |
| <b>ACTH (18-39)</b> |             |                          |
|                     | 500         | 17.3%                    |
|                     | 5,000       | 16.6%                    |
| <b>Alpha MSH</b>    |             |                          |
|                     | 500         | ND                       |
|                     | 5,000       | 0.1%                     |
|                     | 50,000      | ND                       |
|                     | 500,000     | ND                       |

## Cortisol

| Compound                | µg/dL added | Percent Cross-Reactivity |
|-------------------------|-------------|--------------------------|
| Aldosterone             | 1,000       | 0.1%                     |
| Androstenedione         | 10,000      | ND                       |
| Betamethasone           | 1,000       | ND                       |
| Corticosterone          | 400         | 7.5%                     |
| Cortisone               | 400         | 1.0%                     |
| 11-Deoxycorticosterone  | 400         | ND                       |
| 11-Deoxycortisol        | 100         | 1.6%                     |
| 21-Deoxycortisone       | 500         | 0.2%                     |
| Dexamethasone           | 400         | ND                       |
| DHEA-SO <sub>4</sub>    | 10,000      | ND                       |
| Estriol                 | 100         | ND                       |
| Estrone                 | 500         | 0%                       |
| Fluticasone             | 22          | ND                       |
| 17α-Hydroxyprogesterone | 400         | 0.2%                     |
| Methotrexate            | 100         | ND                       |
| Methylprednisolone      | 200         | 22%                      |
|                         | 100         | 25%                      |
| Prednisolone            | 8           | 62%                      |
| Prednisone              | 16          | 6.1%                     |
| Pregnanediol            | 2,000       | 0%                       |
| Progesterone            | 400         | ND                       |
| Spironolactone          | 1,000       | ND                       |
| Tetrahydrocortisone     | 400         | 0%                       |
| Triamcinolone           | 5,000       | 0.023%                   |
|                         | 501         | ND                       |
